# Supplementary material for: Water nanodomains for efficient photocatalytic CO2 reduction to CO
Source: Royal Society of Chemistry journal article supplement (doi:10.1039/d1gc03014k), 2021-01-01
Supplement: d1gc03014k1.pdf [file d1gc03014k1.pdf]

## Water nanodomain for efficient photocatalytic

### CO<sub>2</sub> reduction to CO

Gang Chen<sup>a,b</sup>, Xiuyan Cheng<sup>a,b</sup>, Jianling Zhang<sup>\*a,b</sup>, Qiang Wan<sup>a,b</sup>, Ran Duan<sup>c</sup>, Buxing Han<sup>a,b</sup>, Jie Cui<sup>d</sup>, Junfeng Xiang<sup>b,d</sup>, Bo Guan<sup>d</sup>, Xueqing Xing<sup>e</sup>, Guang Mo<sup>e</sup>, Zhonghua Wu<sup>e</sup>

<sup>a</sup> Beijing National Laboratory for Molecular Sciences, CAS Key Laboratory of Colloid, Interface and Chemical Thermodynamics, CAS Research/Education Center for Excellence in Molecular Sciences, Institute of Chemistry, Chinese Academy of Sciences, Beijing 100190, P.R.China.

<sup>b</sup> School of Chemical Science, University of Chinese Academy of Sciences, Beijing 100049, P.R.China.

<sup>c</sup> CAS Key Laboratory of Photochemistry, Institute of Chemistry, Chinese Academy of Sciences Beijing 100190, P. R. China.

<sup>d</sup> Center for Physicochemical Analysis and Measurement, Institute of Chemistry, Chinese Academy of Sciences Beijing 100190, P. R. China.

<sup>e</sup> Beijing Synchrotron Radiation Facility (BSRF), Institute of High Energy Physics, Chinese Academy of Sciences, Beijing 100049, P.R.China.

\*Corresponding authors:

E-mail addresses: zhangjl@iccas.ac.cn

## Table of contents

- 1. Fig. S1** Droplet size distribution of water-in-oil microemulsion ( $W_0=30$ ).
- 2. Fig. S2** Maximum absorption wavelength changes with  $W_0$  of water-in-oil microemulsions.
- 3. Fig. S3** FT-IR spectra of  $\text{Fe}(\text{tmhd})_3/n$ -hexane solution and microemulsions with  $W_0=10, 30$  and  $40$  in wavenumber range of  $400\text{-}4000\text{ cm}^{-1}$  (a) and  $3100\text{-}4000\text{ cm}^{-1}$  (b).
- 4. Fig. S4** GC spectrum of gaseous mixture of the photocatalytic reaction.  
  
Retention time: 3.345 min (Air), 3.849 min (CO) and 7.265 min ( $\text{CO}_2$ ).
- 5. Fig. S5** Mass spectrometry signal and GC spectrum of the  $\text{CO}_2$  reduction product using  $^{13}\text{CO}_2$  as the feedstock.
- 6. Fig. S6**  $^1\text{H}$  NMR spectra of water-in-oil microemulsion ( $W_0=30$ ) at different temperatures.
- 7. Fig. S7**  $^1\text{H}$  NMR spectra of the water-in-oil microemulsions with different  $W_0$  values.
- 8. Fig. S8** UV-Vis spectra of  $\text{Fe}(\text{tmhd})_3$  in  $n$ -hexane.
- 9. Fig. S9** Reaction mixture before (left) and after (right) reaction for 12 h.
- 10. Fig. S10** Molecular structures of  $\text{Co}(\text{tmhd})_3$ ,  $\text{Fe}(\text{acac})_3$ ,  $\text{Fe}(\text{cp})_2$  and  $\text{FeCl}_3$ .
- 11. Table S1** Control experiments of photocatalytic  $\text{CO}_2\text{RR}$  to CO.
- 12. Table S2** Performances of the reported photocatalytic  $\text{CO}_2\text{RR}$  to CO and this work.

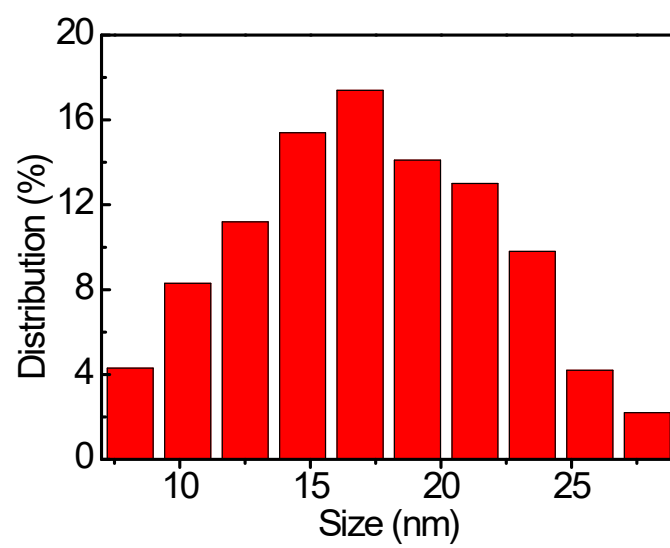

**Fig. S1** Droplet size distribution of water-in-oil microemulsion ( $W_0=30$ ).

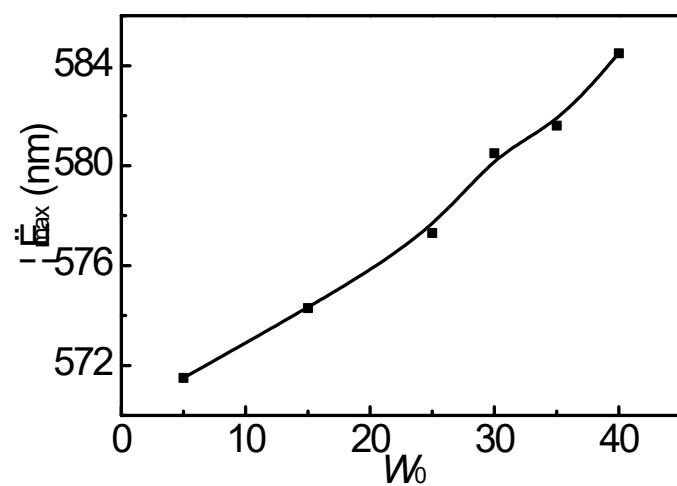

**Fig. S2** Maximum absorption wavelength changes with  $W_0$  of water-in-oil microemulsions.

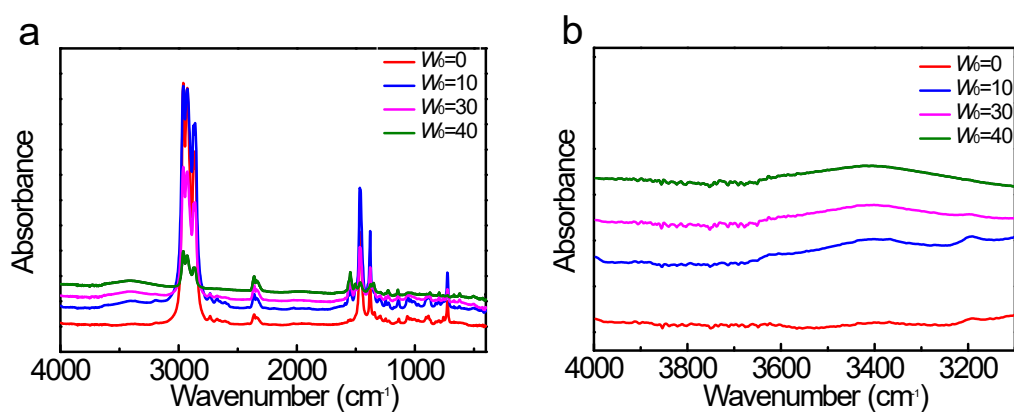

**Fig. S3** FT-IR spectra of  $\text{Fe}(\text{tmhd})_3/n$ -hexane solution and microemulsions with  $W_0=10$ , 30 and 40 in wavenumber range of 400-4000  $\text{cm}^{-1}$  (a) and 3100-4000  $\text{cm}^{-1}$  (b).

In  $\text{Fe}(\text{tmhd})_3/n$ -hexane binary system, the absorptions at 2955, 2927 and 2858  $\text{cm}^{-1}$  correspond to the stretching vibration of C-H. The absorptions at 1466 and 1385  $\text{cm}^{-1}$  can be assigned to the bending vibration of C-H. For the water-in-oil microemulsion, the absorptions around 3200-3500  $\text{cm}^{-1}$  appear and become stronger with increasing  $W_0$ , indicating that more and more water molecules are dissolved in  $\text{Fe}(\text{tmhd})_3/n$ -hexane system to form microemulsion.

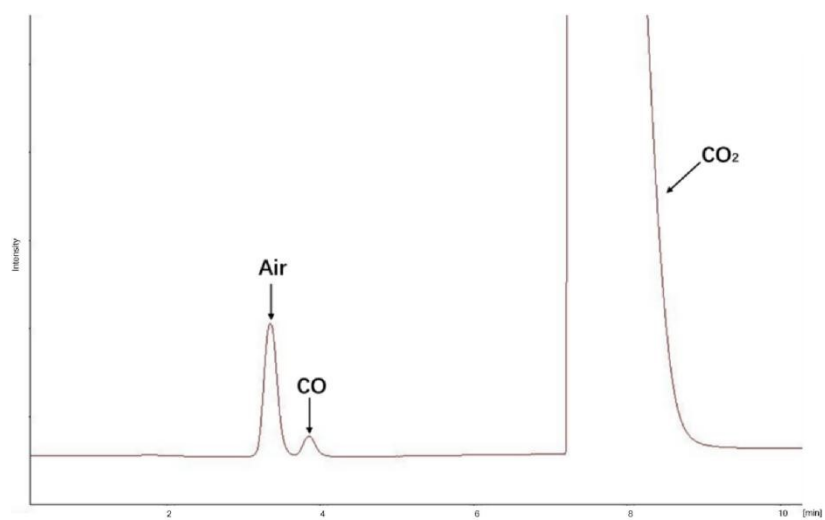

**Fig. S4** GC spectrum of gaseous mixture of the photocatalytic reaction.

Retention time: 3.345 min (Air), 3.849 min (CO) and 7.265 min (CO<sub>2</sub>).

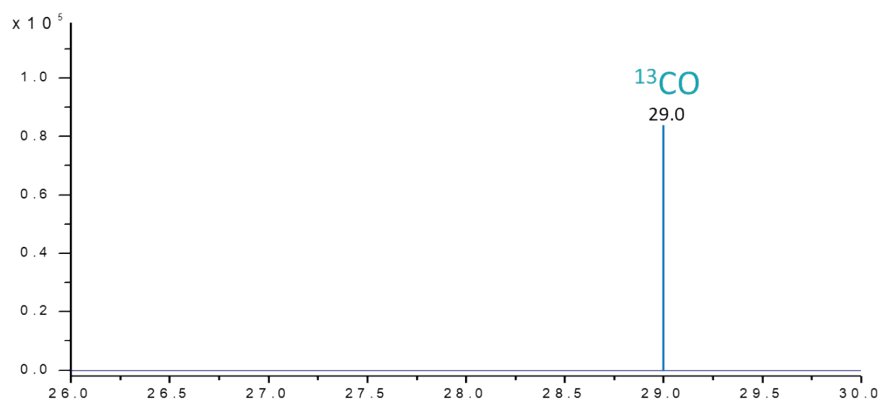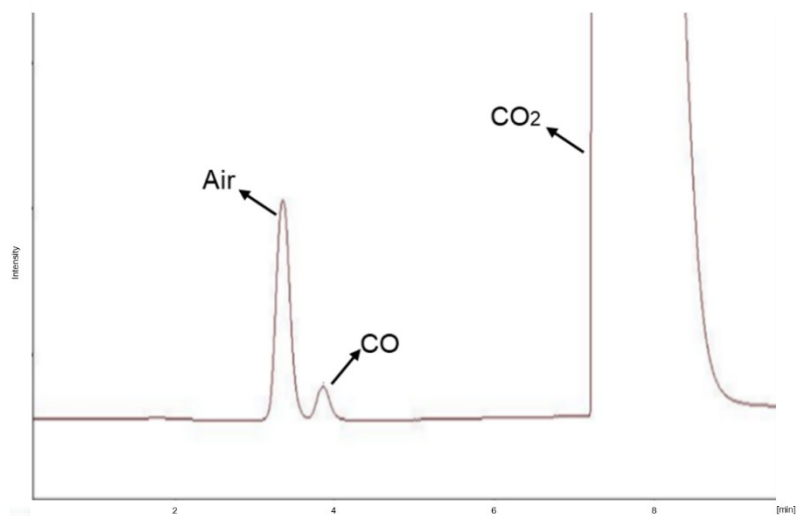

**Fig. S5** Mass spectrometry signal and GC spectrum of the CO<sub>2</sub> reduction product using <sup>13</sup>CO<sub>2</sub> as the feedstock.

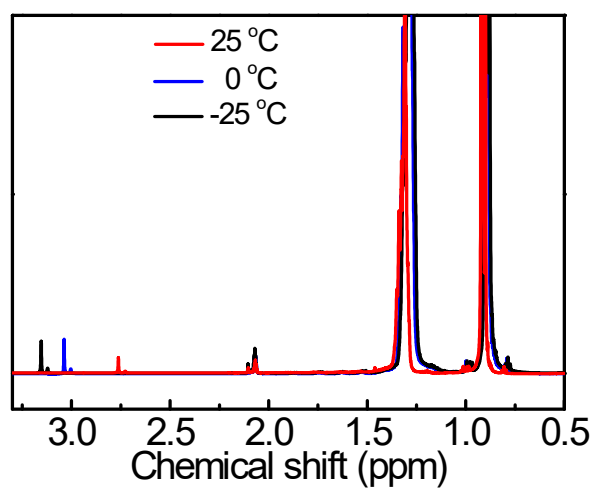

**Fig. S6** <sup>1</sup>H NMR spectra of water-in-oil microemulsion ( $W_0=30$ ) at different temperatures.



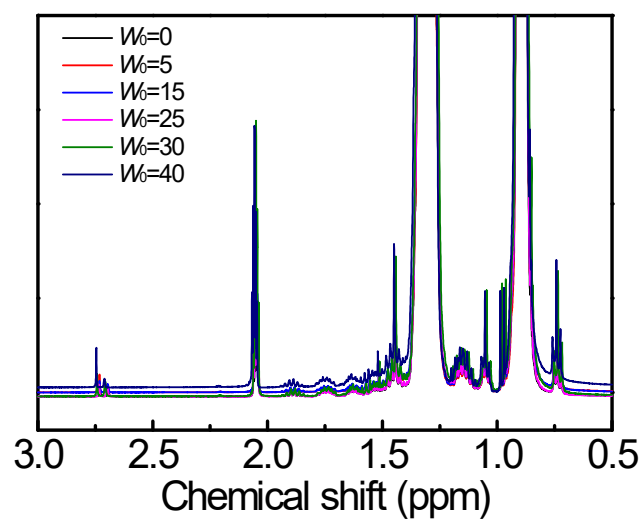

**Fig. S7** <sup>1</sup>H NMR spectra of the water-in-oil microemulsions with different  $W_0$  values.

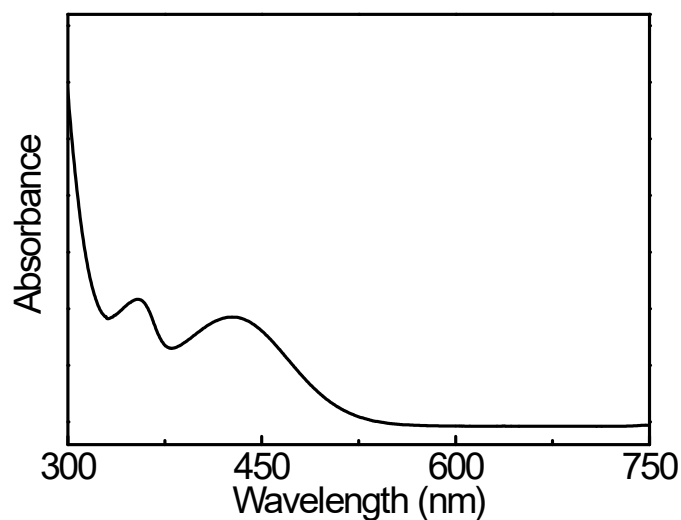

**Fig. S8** UV-Vis spectrum of Fe(tmhd)<sub>3</sub> in *n*-hexane.

The absorption with  $\lambda_{\text{max}}$  of 356 nm is caused by charge transition and belongs to M→L transition. The valence electron layer of the central ion Fe<sup>3+</sup> is configured with d<sup>5</sup> electrons, and its anti-orbital  $\pi^*$  orbital is filled with 5 electrons, which can only accept electrons from the ligand  $\pi$ -orbital transition, and excess electrons can transit to the  $\pi$  orbital of ligand. The absorption with  $\lambda_{\text{max}}$  of 428 nm is caused by the transition of the conjugated  $\pi$  electron in the ligand tmhd<sup>-</sup> and belongs to  $\pi \rightarrow \pi^*$  transition.

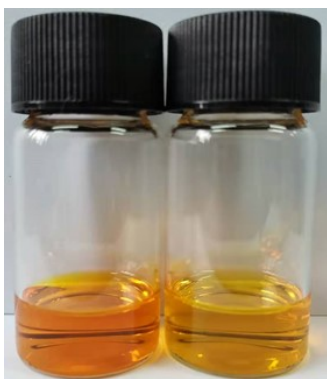

**Fig. S9** Reaction mixture before (left) and after reaction for 12 h (right).

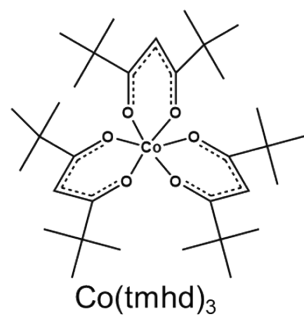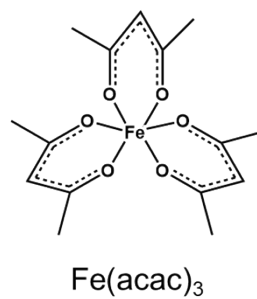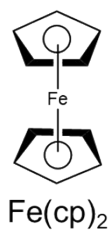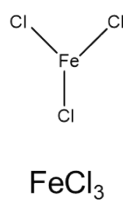

**Fig. S10** Molecular structures of Co(tmhd)<sub>3</sub>, Fe(acac)<sub>3</sub>, Fe(cp)<sub>2</sub> and FeCl<sub>3</sub>.

**Table S1** Control experiments of photocatalytic CO<sub>2</sub>RR to CO.

| Control Conditions       | CO evolution rate<br>( $\mu\text{mol g}^{-1} \text{h}^{-1}$ ) | Selectivity<br>(%) |
|--------------------------|---------------------------------------------------------------|--------------------|
| Normal <sup>[a]</sup>    | 682                                                           | > 99%              |
| No CO <sub>2</sub>       | 0                                                             | 0                  |
| No Fe(tmhd) <sub>3</sub> | 0                                                             | 0                  |
| No light                 | 0                                                             | 0                  |

<sup>[a]</sup>Reactions conditions: 6.0 mg of Fe(tmhd)<sub>3</sub>, 8.0 mL of *n*-hexane, CO<sub>2</sub> 0.1 MPa,  $W_0=30$ , 300 W Xe lamp, wavelength > 360 nm, reaction time 12 h.

**Table S2** Performances of the reported photocatalytic CO<sub>2</sub>RR to CO and this work.<sup>[a]</sup>

| Catalysts                                                  | Solvent                                          | Light         | CO evolution rate<br>( $\mu\text{mol g}^{-1} \text{h}^{-1}$ ) | Selectivity<br>(%) | Ref.      |
|------------------------------------------------------------|--------------------------------------------------|---------------|---------------------------------------------------------------|--------------------|-----------|
| Co-ZIF-9/TiO <sub>2</sub>                                  | H <sub>2</sub> O                                 | >200 nm       | 17.58                                                         | 90.0               | 1         |
| CPO-27-Mg/TiO <sub>2</sub>                                 | H <sub>2</sub> O                                 | ~365 nm       | 4.09                                                          | 63.5               | 2         |
| ZnIn <sub>2</sub> S <sub>4</sub>                           | H <sub>2</sub> O                                 | 400 nm        | 33.2                                                          | -                  | 3         |
| BiOBr atomic layers                                        | H <sub>2</sub> O                                 | visible light | 87.4                                                          | -                  | 4         |
| Bi <sub>12</sub> O <sub>17</sub> C <sub>12</sub> nanotubes | H <sub>2</sub> O                                 | 300 W Xe lamp | 48.6                                                          | -                  | 5         |
| HKUST-1/Cu <sub>2</sub> O/TiO <sub>2</sub>                 | H <sub>2</sub> O                                 | >320 nm       | 85                                                            | 35.4               | 6         |
| ZIF-67/CsPbBr <sub>3</sub>                                 | H <sub>2</sub> O                                 | >420 nm       | 29.6                                                          | 24.2               | 7         |
| MOF-74-Mg/Zn <sub>2</sub> GeO <sub>4</sub>                 | MeCN/H <sub>2</sub> O<br>(v:v=4:1)               | >200 nm       | 12.94                                                         | 100                | 8         |
| NH <sub>2</sub> -UiO-66/CsPbBr <sub>3</sub>                | EtOAC/H <sub>2</sub> O<br>(v:v=300:1)            | >420 nm       | 8.21                                                          | 97.0               | 9         |
| Eosin Y-functionalized COP                                 | H <sub>2</sub> O                                 | >420 nm       | 33                                                            | 92                 | 10        |
| porphyrin-tetra thiafulvalene COF-Zn                       | H <sub>2</sub> O                                 | 420-800       | ~20                                                           | 100                | 11        |
| polymer-TiO <sub>2</sub> -graphene composite               | H <sub>2</sub> O                                 | >420 nm       | ~22                                                           | -                  | 12        |
| CT-COF                                                     | H <sub>2</sub> O                                 | >420 nm       | 102.7                                                         | 98                 | 13        |
| Hypercrosslinked polymer                                   | H <sub>2</sub> O                                 | UV-vis        | ~16                                                           | -                  | 14        |
| Fe(tmhd) <sub>3</sub>                                      | <i>n</i> -hexane/H <sub>2</sub> O<br>(v:v=667:1) | >360 nm       | 682                                                           | >99                | This work |

<sup>[a]</sup>For all these reactions, water was used as only sacrificial, involving no additional sacrificial donor.

## REFERENCES

- [1] S. Yan, S. Ouyang, H. Xu, M. Zhao, X. Zhang and J. Ye, *J. Mater. Chem. A*, 2016, **14**, 15126-15133.
- [2] M. Wang, D. Wang and Z. Li, *Appl. Catal. B Environ.*, 2016, **183**, 47-52.
- [3] X. C. Jiao, Z. W. Chen, X. D. Li, Y. F. Sun, S. Gao, W. S. Yan, C. M. Wang, Q. Zhang, Y. Lin, Y. Luo and Y. Xie, *J. Am. Chem. Soc.*, 2017, **139**, 7586-7594.
- [4] J. Wu, X. D. Li, W. Shi, P. Q. Ling, Y. F. Sun, X. C. Jiao, S. Gao, L. Liang, J. Q. Xu, W. S. Yan, C. M. Wang and Y. Xie, *Angew. Chem. Int. Ed.*, 2018, **57**, 8719-8723.
- [5] J. Di, C. Zhu, M. Ji, M. Duan, R. Long, C. Yan, K. Gu, J. Xiong, Y. She, J. Xia, H. Li and Z. Liu, *Angew. Chem. Int. Ed.*, 2018, **57**, 14847-14851.
- [6] H. Zhao, X. Wang, J. Feng, Y. Chen, X. Yang, S. Gao and R. Cao, *Cat. Sci. Technol.*, 2018, **8**, 1288-1295.
- [7] X. He and W.-N. Wang, *J. Mater. Chem. A*, 2018, **6**, 932-940.
- [8] Z.-C. Kong, J.-F. Liao, Y.-J. Dong, Y.-F. Xu, H.-Y. Chen, D.-B. Kuang and C.-Y. Su, *ACS Energy Lett.*, 2018, **3**, 2656-2662.
- [9] S. Wan, M. Ou, Q. Zhong and X. Wang, *Chem. Eng. J.*, 2019, **358**, 1287-1295.
- [10] X. Yu, Z. Yang, B. Qiu, S. Guo, P. Yang, B. Yu, H. Zhang, Y. Zhao, X. Yang, B. Han and Z. Liu, *Angew. Chem. Int. Ed.*, 2019, **58**, 632-636.
- [11] M. Lu, J. Liu, Q. Li, M. Zhang, M. Liu, J.-L. Wang, D.-Q. Yuan and Y.-Q. Lan, *Angew. Chem. Int. Ed.*, 2019, **58**, 12392-12397.
- [12] S. Wang, M. Xu, T. Peng, C. Zhang, T. Li, I. Hussain, J. Wang and B. Tan, *Nat. Commun.*, 2019, **10**, 676.
- [13] K. Lei, D. Wang, L. Ye, M. Kou, Y. Deng, Z. Y. Ma, L. Wang and Y. Kong, *ChemSusChem*, 2020, **13**, 1725-1729.
- [14] G. E. M. Schukraft, R. T. Woodward, S. Kumar, M. Sachs, S. Eslava and C. Petit, *ChemSusChem*, 2021, **14**, 1-9.
